# Supplementary material
Source: publisher site journal article supplement (https://www.dovepress.com/article/600529)
Supplement: Supplementary file 1 [file 600529%20Revised%20Supplementary%20Material.pdf]

**Supplemental Table 1.** Demographics of survey participants (n=766).

|                       |                               |             |
|-----------------------|-------------------------------|-------------|
| <b>Age</b>            | Mean (SD)                     | 40.8 (14.6) |
|                       | No Answer                     | 129         |
| <b>Biological Sex</b> | Female                        | 723 (94.4%) |
|                       | Male                          | 38 (5.0%)   |
|                       | Other                         | 3 (0.4%)    |
|                       | No Answer                     | 2 (0.3%)    |
| <b>Race</b>           | White                         | 697 (91.0%) |
|                       | Black                         | 6 (0.8%)    |
|                       | Asian                         | 16 (2.1%)   |
|                       | Hawaiian/Pacific Islander     | 2 (0.3%)    |
|                       | American Indian/Alaska Native | 1 (0.1%)    |
|                       | Multiracial                   | 44 (5.7%)   |

**Supplemental Table 2.** Ophthalmic conditions among individuals with less common EDS subtypes.

| Condition                     | aEDS<br>(n = 5) | BCS<br>(n = 1) | cvEDS<br>(n = 3) | clEDS<br>(n = 10) | kEDS<br>(n = 5) | mEDS<br>(n = 2) | spEDS<br>(n = 1) |
|-------------------------------|-----------------|----------------|------------------|-------------------|-----------------|-----------------|------------------|
| Myopia                        | 4 (80%)         | 0              | 1 (33.3%)        | 4 (40%)           | 2 (40%)         | 2 (100%)        | 0                |
| Dry Eye                       | 2 (40%)         | 1 (100%)       | 2 (66.7%)        | 5 (50%)           | 4 (80%)         | 1 (50%)         | 0                |
| Hyperopia                     | 2 (40%)         | 0              | 1 (33.3%)        | 5 (50%)           | 4 (80%)         | 0               | 0                |
| Double Vision                 | 0               | 0              | 0                | 0                 | 0               | 0               | 0                |
| Blue Sclera                   | 2 (40%)         | 1 (100%)       | 0                | 2 (20%)           | 2 (40%)         | 0               | 1 (100%)         |
| Amblyopia                     | 3 (60%)         | 0              | 0                | 0                 | 0               | 0               | 0                |
| Cataract                      | 3 (60%)         | 0              | 1 (33.3%)        | 3 (30%)           | 3 (60%)         | 0               | 0                |
| Ptosis                        | 2 (40%)         | 0              | 0                | 1 (10%)           | 2 (40%)         | 1 (50%)         | 0                |
| Strabismus                    | 1 (20%)         | 0              | 0                | 1 (10%)           | 0               | 0               | 0                |
| PVD                           | 1 (20%)         | 0              | 0                | 1 (10%)           | 0               | 0               | 0                |
| Retinal Tear                  | 1 (20%)         | 0              | 0                | 1 (10%)           | 0               | 0               | 0                |
| Glaucoma                      | 0               | 0              | 1 (33.3%)        | 0                 | 0               | 0               | 0                |
| Uveitis                       | 0               | 0              | 0                | 2 (20%)           | 0               | 0               | 0                |
| Keratoconus                   | 0               | 0              | 0                | 0                 | 0               | 0               | 0                |
| Retinal Detachment            | 3 (60%)         | 0              | 0                | 0                 | 1 (20%)         | 0               | 0                |
| Ocular Trauma                 | 0               | 0              | 0                | 0                 | 0               | 0               | 1 (100%)         |
| Optic Neuritis                | 1 (20%)         | 0              | 0                | 1 (10%)           | 0               | 0               | 0                |
| Macular Hole                  | 0               | 0              | 0                | 2 (20%)           | 0               | 0               | 0                |
| Dry AMD                       | 0               | 0              | 0                | 0                 | 1 (20%)         | 0               | 0                |
| Retinal Hemorrhage            | 0               | 0              | 0                | 0                 | 0               | 0               | 0                |
| Ectopia Lentis                | 0               | 0              | 0                | 0                 | 0               | 0               | 0                |
| Iris Coloboma                 | 0               | 0              | 0                | 0                 | 0               | 0               | 0                |
| CNV                           | 0               | 0              | 0                | 1 (10%)           | 0               | 0               | 0                |
| Wet AMD                       | 0               | 0              | 0                | 0                 | 0               | 0               | 0                |
| Angioid Streaks               | 1 (20%)         | 0              | 0                | 0                 | 0               | 0               | 0                |
| Staphyloma                    | 0               | 0              | 0                | 0                 | 0               | 0               | 0                |
| Retinitis Pigmentosa          | 0               | 0              | 0                | 0                 | 0               | 1 (50%)         | 0                |
| Pattern Dystrophy             | 0               | 0              | 0                | 0                 | 0               | 0               | 0                |
| Globe Rupture                 | 0               | 0              | 0                | 0                 | 0               | 0               | 0                |
| Retinal Artery/Vein Occlusion | 0               | 0              | 0                | 0                 | 0               | 0               | 0                |
| Diabetic Retinopathy          | 0               | 0              | 0                | 0                 | 0               | 0               | 0                |

Values are reported as n (%).

**aEDS:** Arthrochalasia, **BCS:** Brittle cornea syndrome, **cvEDS:** Cardiac-valvular, **clEDS:** Classical-like, **kEDS:** Kyphoscoliotic, **mEDS:** Myopathic, **spEDS:** Spondylodysplastic

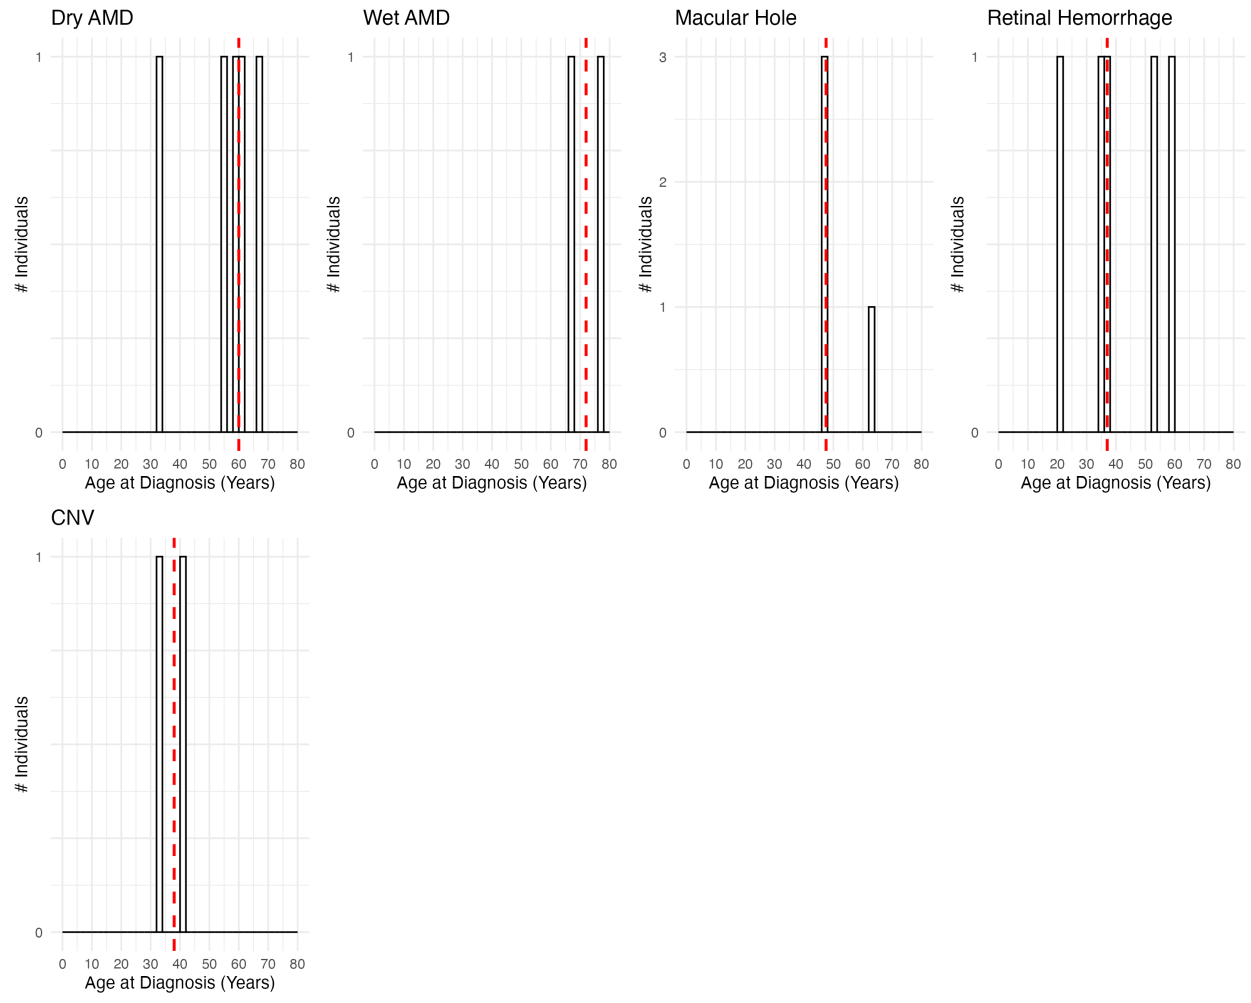

**Supplemental Figure 1.** Age of onset of less common ophthalmic conditions (fewer than 10 responses) in individuals with hypermobile EDS. The red line represents the median age.

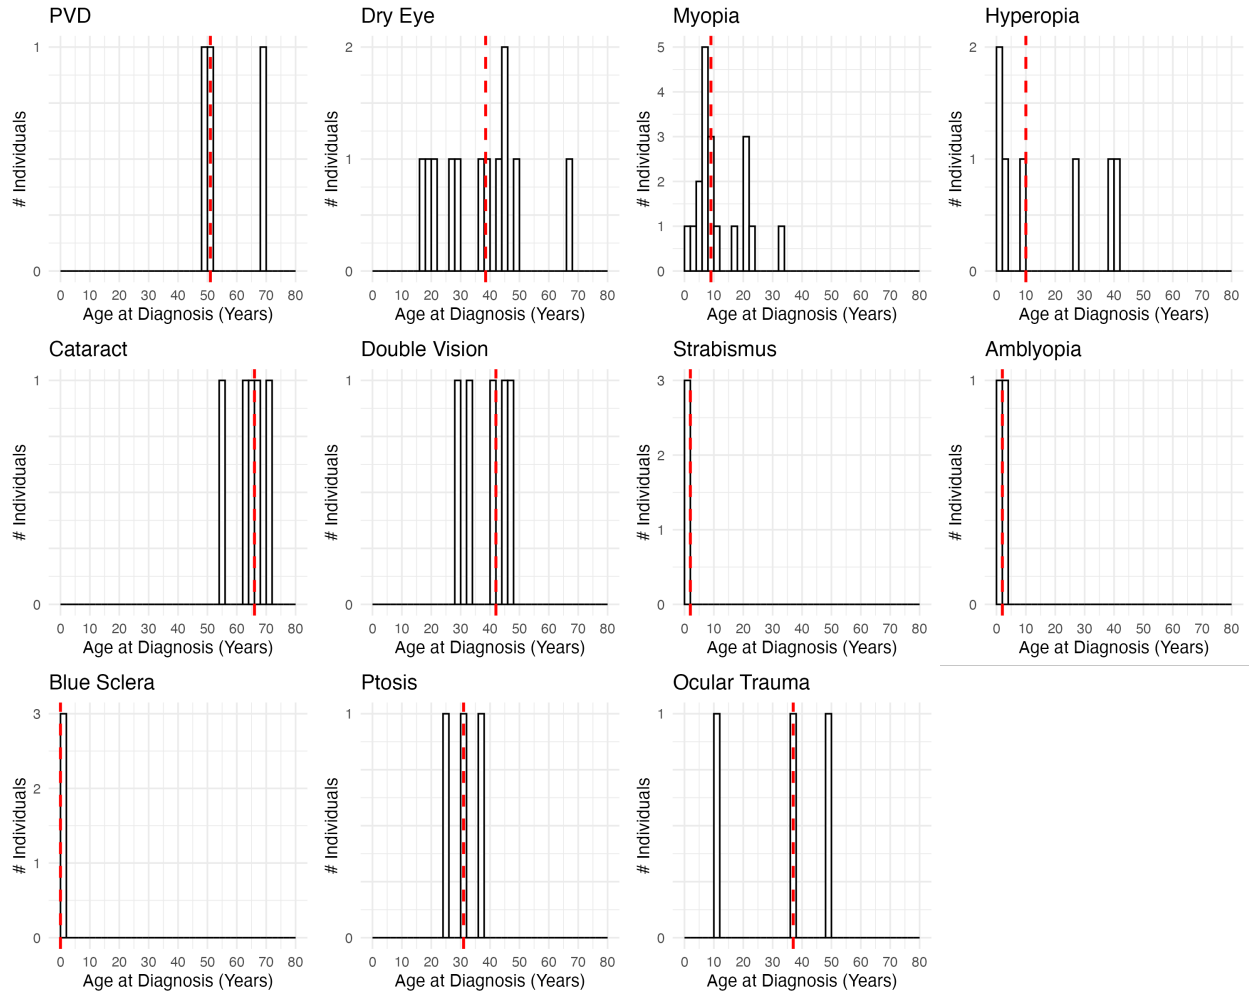

**Supplemental Figure 2.** Age of onset of ophthalmic conditions in individuals with vascular EDS. The red line represents the median age.

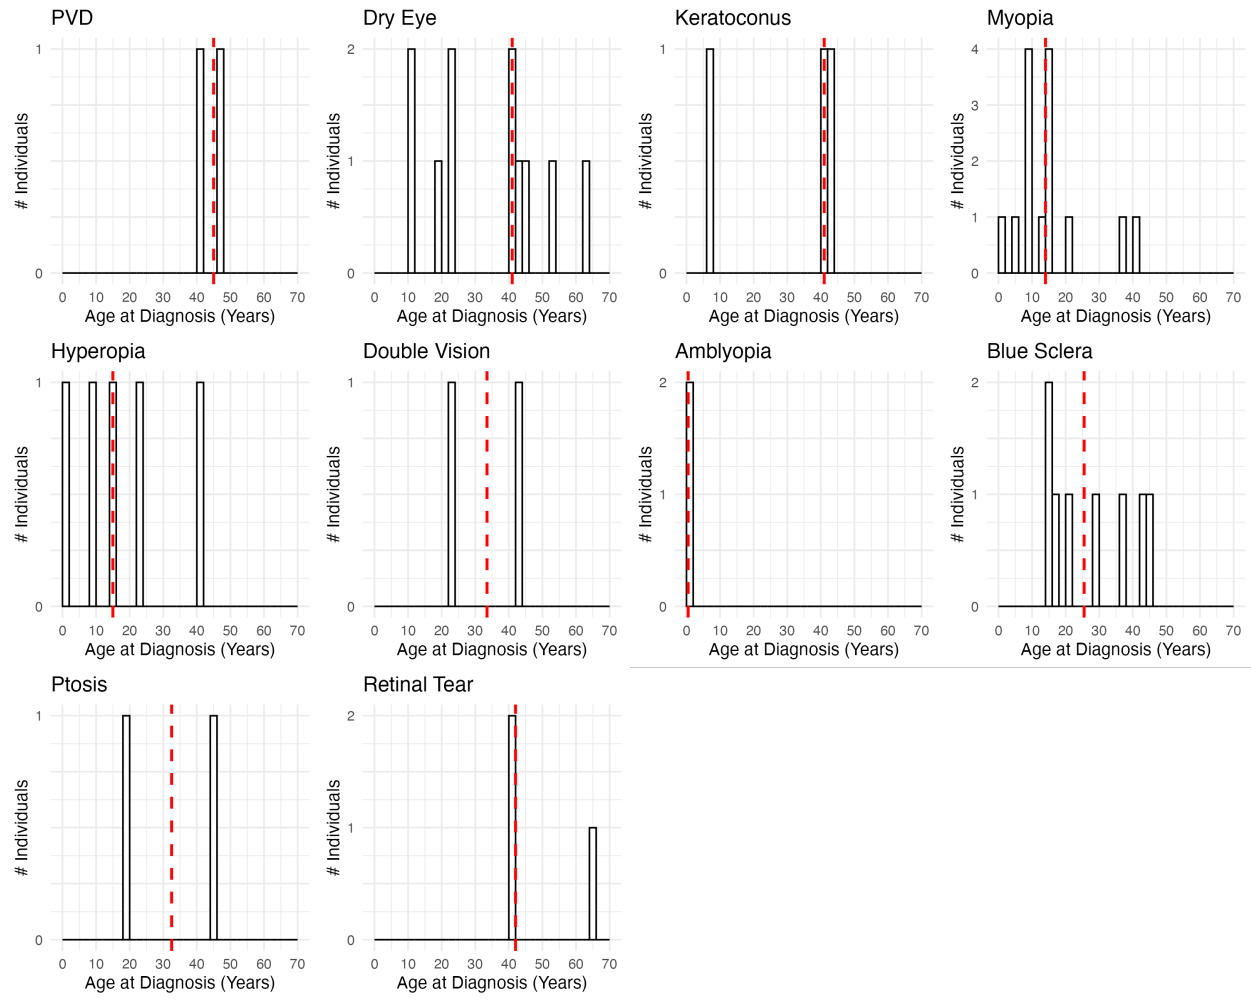

**Supplemental Figure 3.** Age of onset of ophthalmic conditions in individuals with classical EDS. The red line represents the median age.
